# Supplementary material for: Rhodiola rosea Reduces Intercellular Signaling in Campylobacter jejuni
Source: MDPI journal article supplement (doi:10.3390/antibiotics11091220), 2022-09-08
Supplement: s1 [file s1]

**Table S1.** Identified compounds in the ethanolic extract from *R. rosea* “Mattmark”.

| No. | tR (min) | [M-H] <sup>-</sup> (m/z) | MS <sup>n</sup> [parent ion], m/z                                                                     | UV λ <sub>max</sub> | Identified compounds                                          | Compound group             |
|-----|----------|--------------------------|-------------------------------------------------------------------------------------------------------|---------------------|---------------------------------------------------------------|----------------------------|
| 1   | 1.60     | 169                      | MS <sup>2</sup> [169]: 125                                                                            | 215, 272            | Gallic acid                                                   | Benzoic acid               |
| 2   | 3.06     | 331                      | /                                                                                                     | /**                 | Galloyl glucose                                               | Phenolic glycoside         |
| 3   | 3.11     | 258                      | MS <sup>2</sup> [304]*: 258, 179, 161<br>MS <sup>3</sup> [179]: 161, 143, 131, 119, 89                | 209                 | Rhodiocyanoside A                                             | Cyanogenic glycoside       |
| 4   | 4.17     | 260                      | MS <sup>2</sup> [306]*: 260, 188, 161<br>MS <sup>3</sup> [260]: 188, 161                              | /**                 | Lotaustralin                                                  | Cyanogenic glycoside       |
| 5   | 4.61     | 297                      | MS <sup>2</sup> [343]*: 297, 135                                                                      | 266                 | Phenolic hexoside                                             | Phenolic hexoside          |
| 6   | 4.90     | 299                      | MS <sup>2</sup> [345]*: 299<br>MS <sup>3</sup> [299]: 179, 161, 143, 131, 119, 113, 101               | 221, 276            | Salidroside                                                   | Phenylethyl glycoside      |
| 7   | 5.51     | 761                      | MS <sup>2</sup> [761]: 635, 609, 593, 591, 473, 483, 423<br>MS <sup>3</sup> [423]: 379, 297, 283, 243 | 207, 273            | Epigallocatechin-epigallocatechin gallate (EGC-EGCG)          | Proanthocyanidin dimer     |
| 8   | 7.27     | 913                      | MS <sup>2</sup> [913]: 761, 743, 591, 573, 423<br>MS <sup>3</sup> [761]: 379                          | 205, 275            | Epigallocatechin gallate-epigallocatechin gallate (EGCG-EGCG) | Proanthocyanidin dimer     |
| 9   | 7.73     | 457                      | MS <sup>2</sup> [457]: 331, 305, 169<br>MS <sup>3</sup> [169]: 125                                    | 207, 274            | Epigallocatechin-3-O-gallate                                  | Flavanol (Catechin)        |
| 10  | 8.92     | 415                      | MS <sup>2</sup> [461]*: 415<br>MS <sup>3</sup> [415]: 191, 149, 131                                   | /**                 | 2-Phenylethyl-vicianoside                                     | Phenylethyl glycoside      |
| 11  | 10.52    | 427                      | MS <sup>2</sup> [473]*: 427, 293<br>MS <sup>3</sup> [427]: 293, 149                                   | 251                 | Rosarin                                                       | Cinnamyl alcohol glycoside |
| 12  | 10.77    | 465                      | MS <sup>2</sup> [511]*: 465<br>MS <sup>3</sup> [465]: 333, 293, 191, 149                              | /**                 | Rhodiolide E                                                  | Acyclic alcohol glycoside  |
| 13  | 10.88    | 427                      | MS <sup>2</sup> [473]*: 427, 293<br>MS <sup>3</sup> [427]: 293, 149                                   | 251                 | Rosavin                                                       | Cinnamyl alcohol glycoside |
| 14  | 11.18    | 427                      | MS <sup>2</sup> [473]*: 427, 293<br>MS <sup>3</sup> [427]: 293, 149                                   | 252                 | Cinnamyl-pentosyl-hexoside                                    | Cinnamyl alcohol glycoside |
| 15  | 11.47    | 331                      | MS <sup>2</sup> [377]*: 331, 179<br>MS <sup>3</sup> [179]: 161, 143, 131, 119, 113, 89                | 193, 262            | Rosiridin                                                     | Acyclic alcohol glycoside  |
| 16  | 14.76    | 609                      | MS <sup>2</sup> [609]: 463, 301<br>MS <sup>3</sup> [301]: 301, 283, 255, 229, 211, 201                | 276, 332, 384       | Rhodosin (herbacetin-7-O-glucorhamnoside)                     | Flavanol glycoside         |
| 17  | 15.10    | 447                      | MS <sup>2</sup> [447]: 301<br>MS <sup>3</sup> [301]: 301, 283, 255, 229, 211, 201                     | 276, 329, 384       | Rhodonin (herbacetin-7-O-α-L-rhamnopyranoside)                | Flavanol glycoside         |
| 18  | 18.66    | 479                      | /                                                                                                     | 280, 330, 338       | Rhodiolin                                                     | Flavolignan                |

\* Fragmentation of [M-H+HCOOH]<sup>-</sup> as parent ion in MS<sup>2</sup> is indicated by an asterisk, in all other cases fragment ions of [M-H]<sup>-</sup> as parent ion are presented;

\*\* Not detected in the UV chromatogram due to the low concentration; / no further fragment ions observed (low concentration)

**Table S2.** Identified compounds in the ethanolic extract from *R. rosea* “Rosavine”.

| No. | tR (min) | [M-H] (m/z) | MS <sup>n</sup> (m/z)                                                                            | UV $\lambda_{\text{max}}$ | Identified compounds                                          | Compound group             |
|-----|----------|-------------|--------------------------------------------------------------------------------------------------|---------------------------|---------------------------------------------------------------|----------------------------|
| 1   | 1.62     | 169         | MS <sup>2</sup> [169]: 125                                                                       | 215, 269                  | Gallic acid                                                   | Benzoic acid               |
| 2   | 3.07     | 331         | /                                                                                                | 209                       | Galloyl glucose                                               | Phenolic glycoside         |
| 3   | 3.10     | 258         | MS <sup>2</sup> [304]*: 258, 179, 161<br>MS <sup>3</sup> [179]: 161, 143, 131, 119, 89           | 209                       | Rhodiocyanoside A                                             | Cyanogenic glycoside       |
| 4   | 4.15     | 260         | MS <sup>2</sup> [306]*: 260, 188, 161<br>MS <sup>3</sup> [260]: 188, 161                         | /**                       | Lotaustralin                                                  | Cyanogenic glycoside       |
| 5   | 4.88     | 299         | MS <sup>2</sup> [345]*: 299<br>MS <sup>3</sup> [299]: 179, 161, 143, 131, 119, 113, 101, 89      | 221, 276                  | Salidroside                                                   | Phenylethyl glycoside      |
| 6   | 5.51     | 761         | MS <sup>2</sup> [761]: 635, 609, 593, 575, 483, 423<br>MS <sup>3</sup> [423]: 379, 297, 283, 243 | 207, 276                  | Epigallocatechin-epigallocatechin gallate (EGC-EGCG)          | Proanthocyanidin dimer     |
| 7   | 7.27     | 913         | MS <sup>2</sup> [913]: 761, 743, 591, 573, 423<br>MS <sup>3</sup> [761]: 379                     | 205, 276                  | Epigallocatechin gallate-epigallocatechin gallate (EGCG-EGCG) | Proanthocyanidin dimer     |
| 8   | 7.72     | 457         | MS <sup>2</sup> [457]: 331, 305, 169<br>MS <sup>3</sup> [169]: 125                               | 207, 275                  | Epigallocatechin-3-O-gallate                                  | Flavanol (Catechin)        |
| 9   | 8.92     | 415         | MS <sup>2</sup> [461]*: 415<br>MS <sup>3</sup> [415]: 191, 149, 131                              | /**                       | 2-Phenylethyl-vicianoside                                     | Phenylethyl glycoside      |
| 10  | 9.63     | 609         | MS <sup>2</sup> [609]*: 463<br>MS <sup>3</sup> [463]: 301, 300                                   | 275, 326, ?               | Rhodonidin (herbacetin-7-O-rhamnosyl-8-O-glucoside)           | Flavonol glycoside         |
| 11  | 10.51    | 427         | MS <sup>2</sup> [473]*: 427, 293<br>MS <sup>3</sup> [427]: 293, 149                              | 251                       | Rosarian                                                      | Cinnamyl alcohol glycoside |
| 12  | 10.80    | 465         | MS <sup>2</sup> [511]*: 465<br>MS <sup>3</sup> [465]: 333, 293, 191, 149                         | /**                       | Rhodioloid E                                                  | Acyclic alcohol glycoside  |
| 13  | 10.88    | 427         | MS <sup>2</sup> [473]*: 427, 293<br>MS <sup>3</sup> [427]: 239, 149                              | 251                       | Rosavin                                                       | Cinnamyl alcohol glycoside |
| 14  | 11.18    | 427         | MS <sup>2</sup> [473]*: 427, 293<br>MS <sup>3</sup> [427]: 239, 149                              | 251                       | Cinnamyl-pentosyl-hexoside                                    | Cinnamyl alcohol glycoside |
| 15  | 11.46    | 331         | MS <sup>2</sup> [377]*: 331, 179<br>MS <sup>3</sup> [179]: 161, 143, 131, 119, 89                | 193, 262                  | Rosiridin                                                     | Acyclic alcohol glycoside  |
| 16  | 14.76    | 609         | MS <sup>2</sup> [609]: 463, 301<br>MS <sup>3</sup> [301]: 301, 283, 255, 229, 211, 201           | 276, 332, 384             | Rhodosin (herbacetin-7-O-glucorhamnoside)                     | Flavonol glycoside         |
| 17  | 15.10    | 447         | /                                                                                                | 276, 330, 384             | Rhodonin (herbacetin-7-O- $\alpha$ -L-rhamnopyranoside)       | Flavonol glycoside         |

\* Fragmentation of [M-H+HCOOH]<sup>+</sup> as parent ion in MS<sup>2</sup> is indicated by an asterisk, in all other cases fragment ions of [M-H]<sup>+</sup> as parent ion are presented;

\*\* Not detected in the UV chromatogram due to the low concentration; / no further fragment ions observed (low concentration)

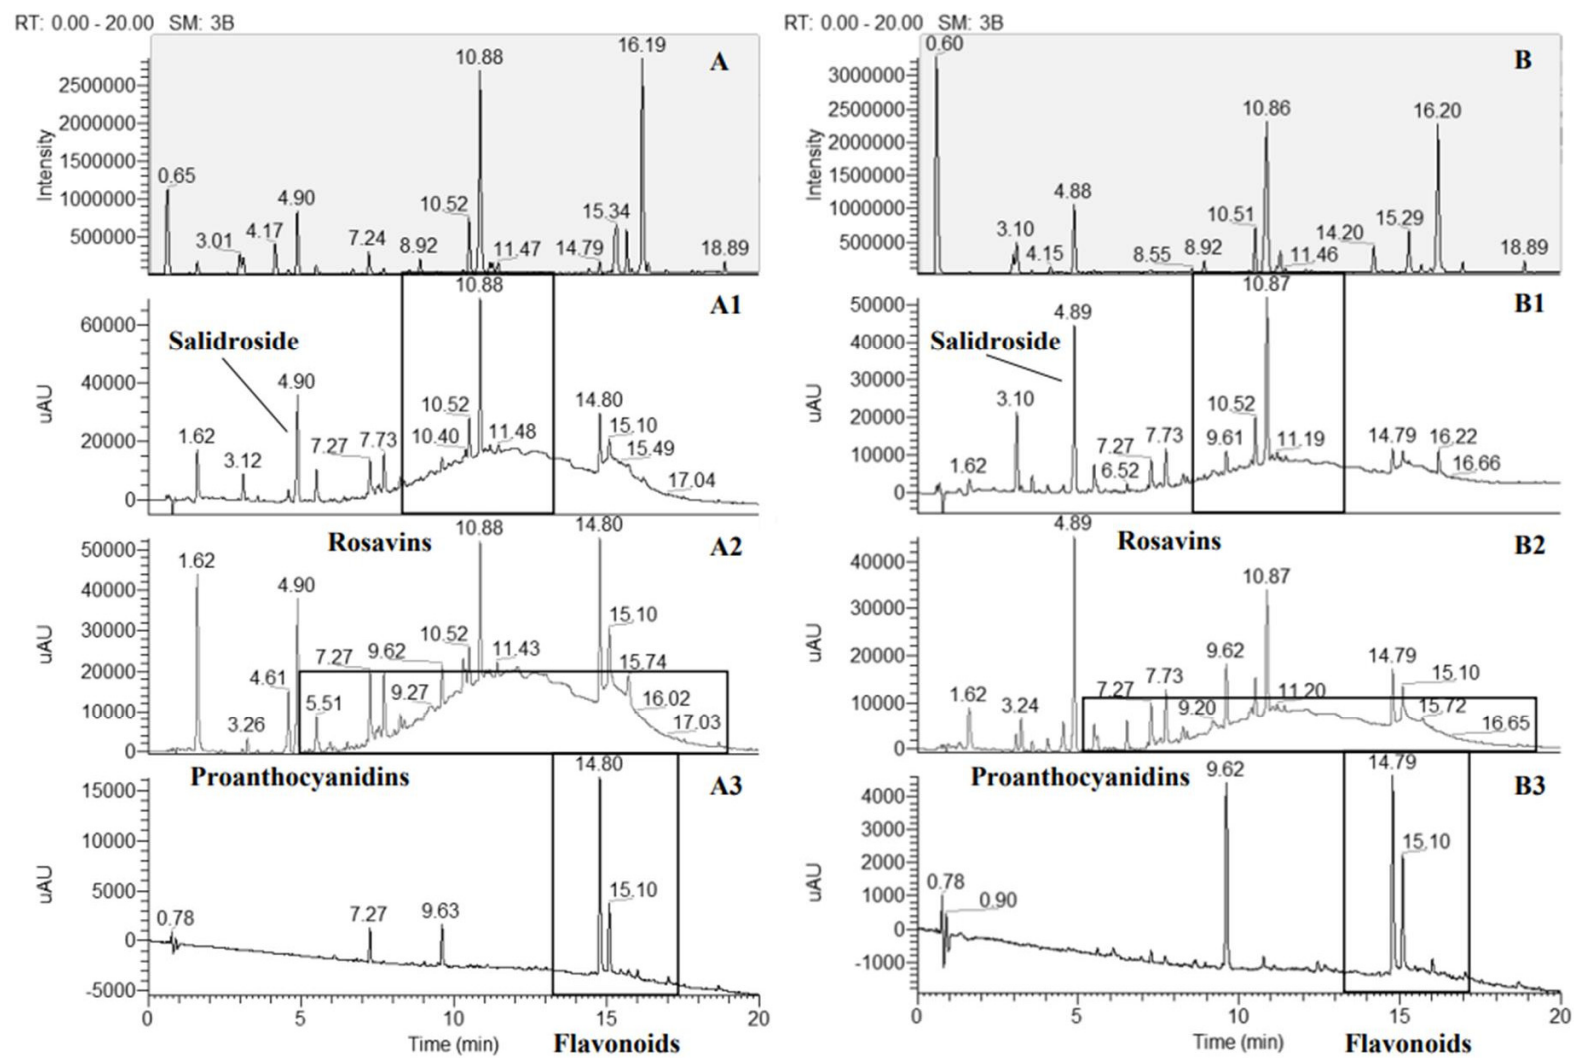

**Figure S1.** The base peak (A: "Mattmark"; B: "Rosavine") and UV chromatograms (A1; B1: total scan; A2; B2: 276 nm; A3; B3: 360 nm) from UHPLC-PDA-ESI-MS analysis of *R. rosea* ethanolic extracts.

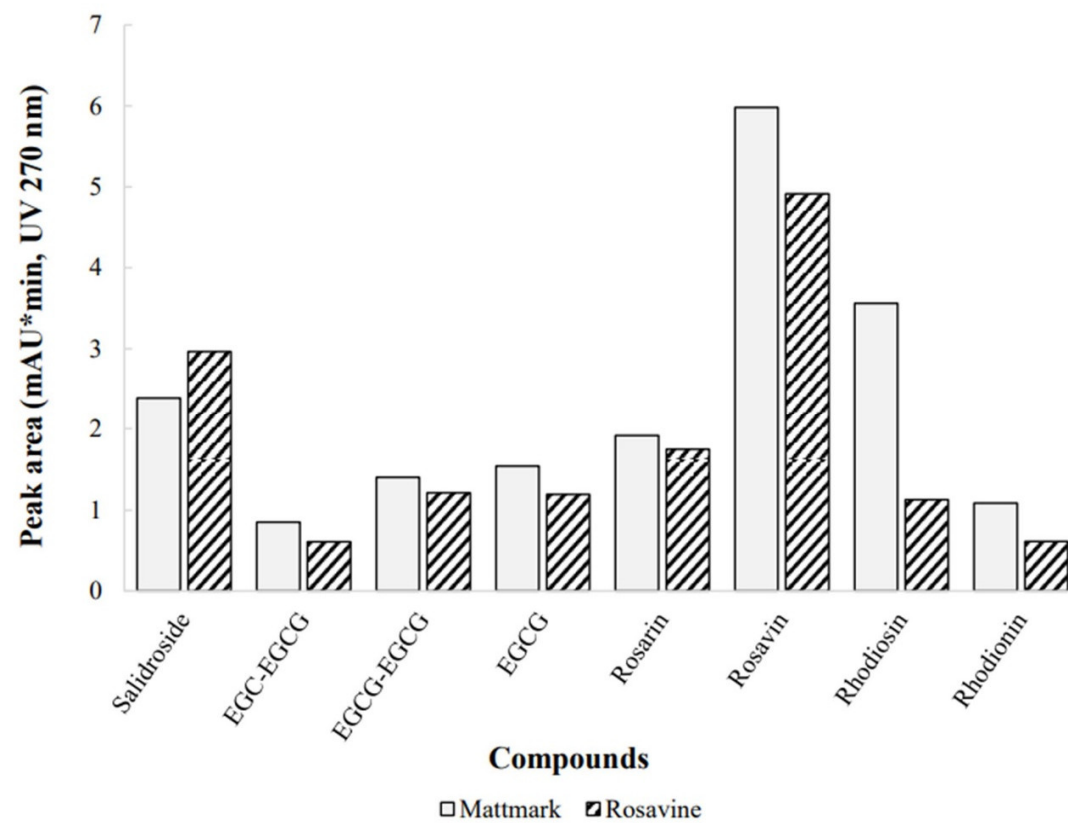

**Figure S2.** Comparison of peak areas at UV 270 nm of the crude ethanolic extracts of *R. rosea* roots “Mattmark” and “Rosavine”. Samples were analyzed at a concentration of 5 mg/mL.

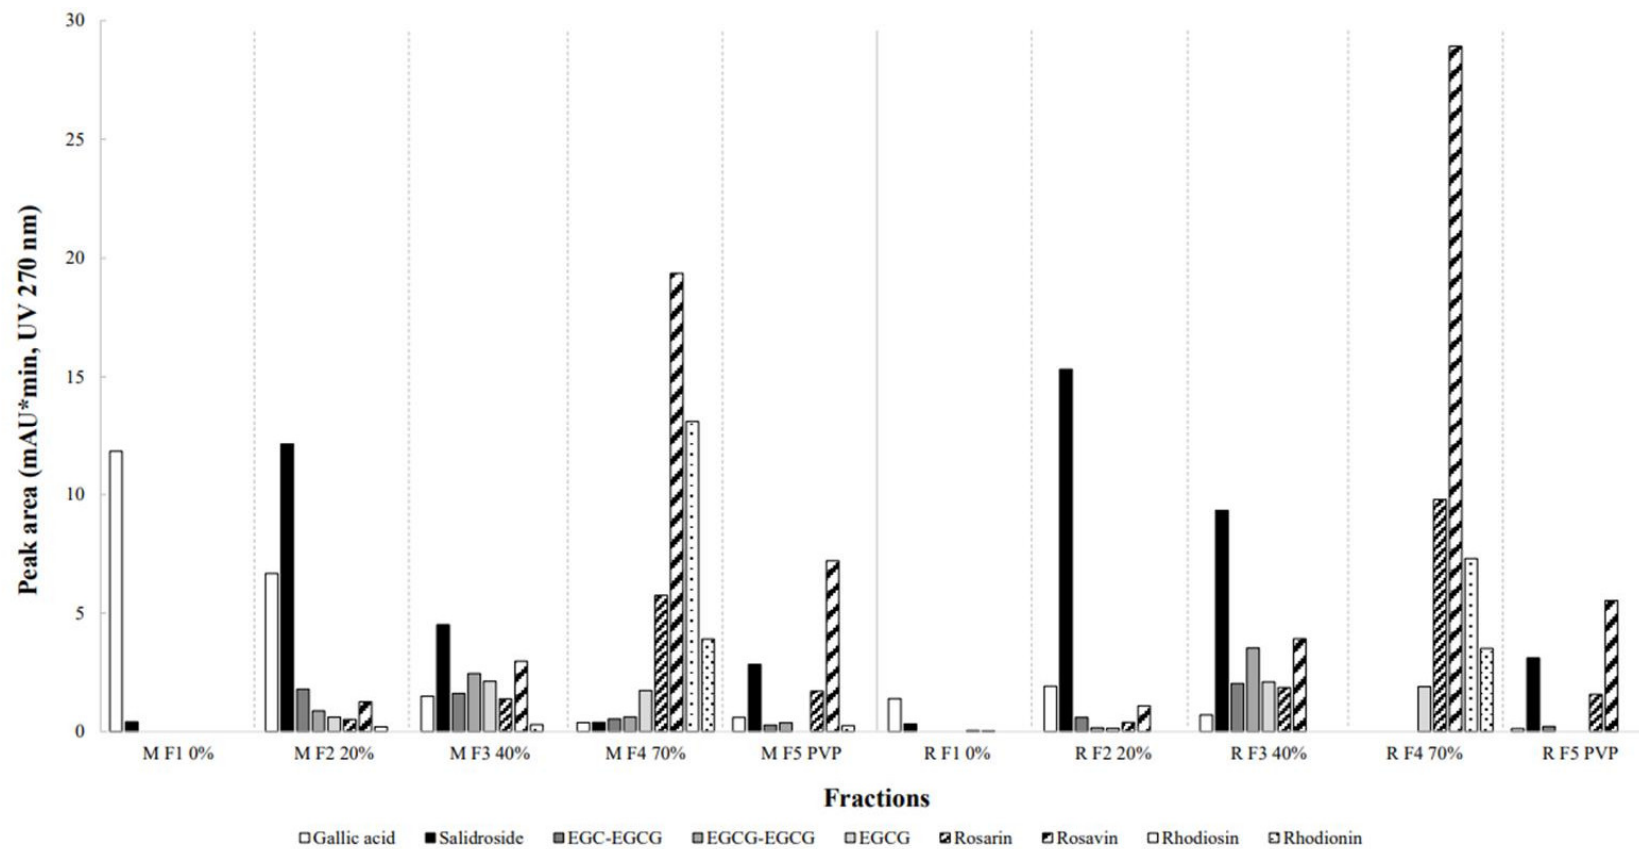

**Figure S3.** Comparison of peak areas at UV 270 nm of fractions F1 to F5 of "Mattmark" (M) and "Rosavine" (R). Samples were analyzed at a concentration of 5 mg/mL.
